# Supplementary material for: Rapid molecular diagnostics of tuberculosis resistance by targeted stool sequencing
Source: PubMed Central journal article supplement (PMC9118838; doi:10.1186/s13073-022-01054-6), 2022-05-19
Supplement: 13073_2022_1054_MOESM1_ESM.pdf [file 13073_2022_1054_MOESM1_ESM.pdf]

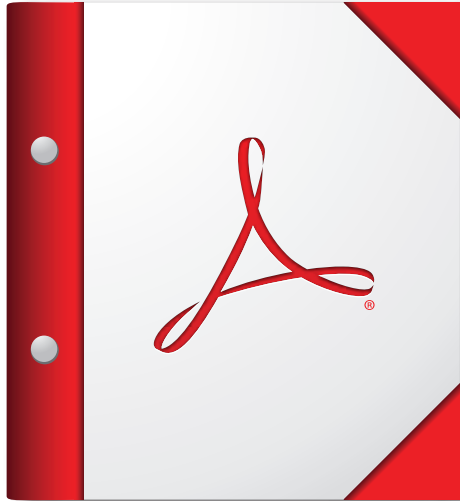

**For the best experience, open this PDF portfolio in  
Acrobat X or Adobe Reader X, or later.**

[Get Adobe Reader Now!](#)
